# Supplementary material for: The reactivity of quaternary ammonium- versus potassium- fluorides supported on metal oxides: paving the way to an instantaneous detoxification of chemical warfare agents
Source: Royal Society of Chemistry journal article supplement (doi:10.1039/c1ob06136d), 2011-01-01
Supplement: c1ob06136d.pdf [file c1ob06136d.pdf]

## Electronic Supplementary Information

# The Reactivity of Quaternary Ammonium- *versus* Potassium-Fluorides Supported on Metal Oxides: Paving the Way to an Instantaneous Detoxification of Chemical Warfare Agents

Yossi Zafrani\*, Lea Yehezkel, Michael Goldvaser, Daniele Marciano, Daniel Waysbort, Eytan Gershonov and Ishay Columbus\*

The Department of Organic Chemistry, Israel Institute for Biological Research, Ness-Ziona, 74100, Israel;  
E-mail: [yossiz@iibr.gov.il](mailto:yossiz@iibr.gov.il); [ishayc@iibr.gov.il](mailto:ishayc@iibr.gov.il)

### Table of contents:

**Fig. S2:** Selected  $^{13}\text{C}$  MAS NMR spectra of adsorbed HD\* (1% wt) on  $\text{KF}/\text{Al}_2\text{O}_3$  (6, EtOH, 60), containing 1 mmol KF, and its degradation profile onto this sorbent.

**Fig. S3:** Selected  $^{13}\text{C}$  MAS NMR spectra of adsorbed HD\* (1% wt) on  $\text{TMAF}/\text{Al}_2\text{O}_3$  (16, EtOH, 60), containing 1 mmol TMAF, and its degradation profile onto this sorbent.

**Fig. S4:** Selected  $^{13}\text{C}$  MAS NMR spectra of adsorbed HD\* (1% wt) on  $\text{TMAF}/\text{Al}_2\text{O}_3$  (33, EtOH, 60), containing 2 mmol TMAF, and its degradation profile onto this sorbent.

**Fig. S5:** Selected  $^{13}\text{C}$  MAS NMR spectra of adsorbed HD\* (1% wt) on  $\text{TEAF}/\text{Al}_2\text{O}_3$  (18, EtOH, 60), containing 1 mmol TEAF, and its degradation profile onto this sorbent.

**Fig. S6:** Selected  $^{13}\text{C}$  MAS NMR spectra of adsorbed HD\* (1% wt) on  $\text{DTMAF}/\text{Al}_2\text{O}_3$  (27, EtOH, 60), containing 1 mmol DTMAF, and its degradation profile onto this sorbent.

**Fig. S7:**  $^{13}\text{C}$  MAS NMR spectra of adsorbed HD\* (1% wt) on  $\text{BTMAF}/\text{Al}_2\text{O}_3$  (20, EtOH, 60), containing 1 mmol TAAF, and its degradation profile onto this sorbent.

**Fig. S8:** Selected  $^{13}\text{C}$  MAS NMR spectra of adsorbed HD\* (5% wt) on  $\text{TBAF}/\text{Al}_2\text{O}_3$  (20, EtOH, 60) and its degradation profile onto this sorbent.

**Fig. S9:**  $^{13}\text{C}$  MAS NMR spectra of adsorbed HD\* (1% wt) on  $\text{KF}/\text{SiO}_2$  (12, EtOH, 60), containing 2 mmol KF, and its degradation profile onto this sorbent.

**Fig. S10:** Selected  $^{13}\text{C}$  MAS NMR spectra of adsorbed HD\* (1% wt) on  $\text{TEAF}/\text{SiO}_2$  (18, EtOH, 60), containing 1 mmol TEAF, and its degradation profile onto this sorbent.

**Fig. S11:** Selected  $^{13}\text{C}$  MAS NMR spectra of adsorbed HD\* (1% wt) on  $\text{TEAF}/\text{TiO}_2$  (18, EtOH, 60), containing 1 mmol TEAF, and its degradation profile onto this sorbent.

**Fig. S12:** Selected  $^{13}\text{C}$  MAS NMR spectra of adsorbed HD\* (1% wt) on  $\text{KF}/\text{TiO}_2$  (12, EtOH, 60), containing 2 mmol KF.

**Fig. S13:** Selected  $^{31}\text{P}$  MAS NMR spectra of adsorbed VX (1% wt) on  $\text{KF}/\text{Al}_2\text{O}_3$  (25, EtOH, 60) and its degradation profile onto this sorbent.

**Fig. S14:** Selected  $^{31}\text{P}$  MAS NMR spectra of adsorbed VX (1% wt) on  $\text{TBAF}/\text{Al}_2\text{O}_3$  (20, EtOH, 60) and its degradation profile onto this sorbent.

**Fig. S15:** Selected  $^{13}\text{C}$  MAS NMR spectra of adsorbed HD\* (1% wt) on  $\text{KF}/\text{Al}_2\text{O}_3$  (25, EtOH, 60) and its degradation profile onto this sorbent.

**Fig. S16:** Selected  $^{13}\text{C}$  MAS NMR spectra of adsorbed HD\* (10% wt) on  $\text{KF}/\text{Al}_2\text{O}_3$  (25, EtOH, 60) and its degradation profile onto this sorbent.

**Fig. S17:** Selected  $^{13}\text{C}$  MAS NMR spectra of adsorbed HD\* (10% wt) on  $\text{TBAF}/\text{KF}/\text{Al}_2\text{O}_3$  (20, 20, EtOH, 60) and its degradation profile onto this sorbent.

**Fig. S18:** Selected  $^{31}\text{P}$  MAS NMR spectra of adsorbed VX (10% wt) on  $\text{TBAF}/\text{KF}/\text{Al}_2\text{O}_3$  (20, 20, EtOH, 60) and its degradation profile onto this sorbent.

**Fig. S19:**  $^{31}\text{P}$  MAS NMR spectra of adsorbed GB (10% wt) on  $\text{TBAF}/\text{KF}/\text{Al}_2\text{O}_3$  (20, 20, EtOH, 60) and its degradation profile onto this sorbent.

**Fig. S20:** GC-MS chromatogram of the extraction mixture of HD\* on  $\text{KF}/\text{TiO}_2$  (12, EtOH, 60).

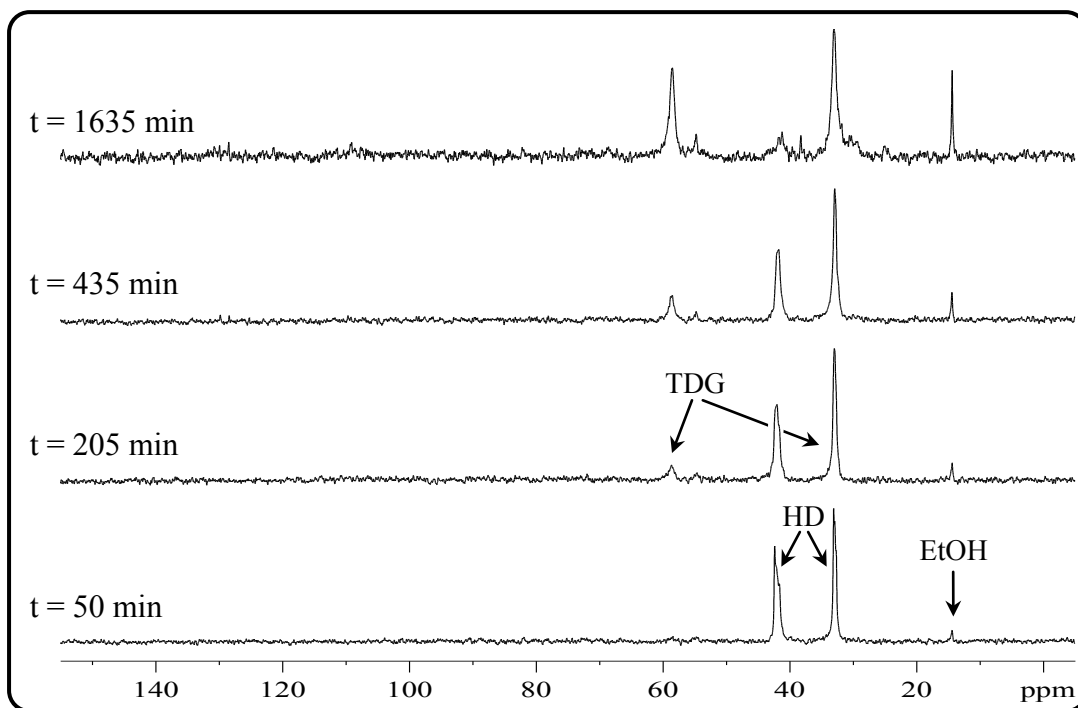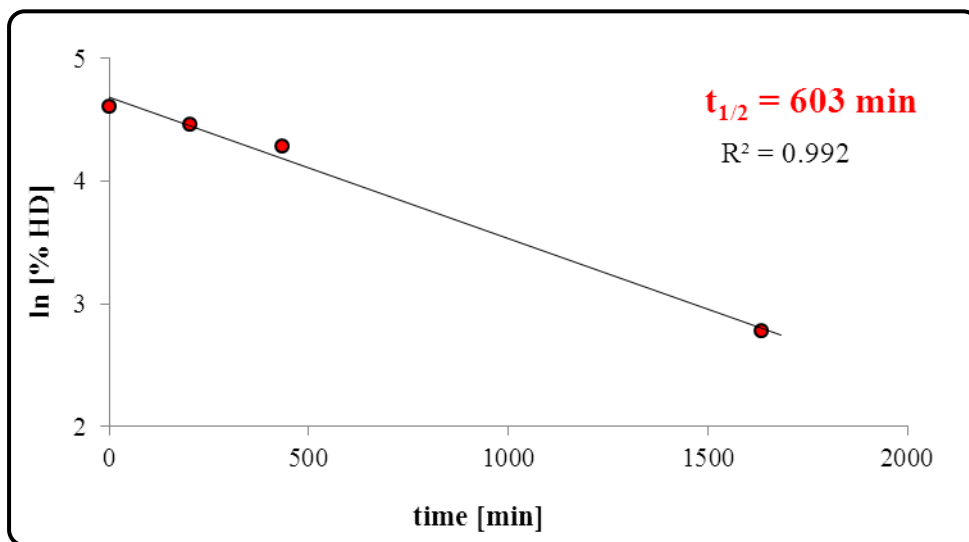

**Fig. S2:** Selected  $^{13}\text{C}$  MAS NMR spectra of adsorbed HD\* (1% wt) on KF/Al<sub>2</sub>O<sub>3</sub> (6, EtOH, 60), containing 1 mmol KF, and its degradation profile onto this sorbent.

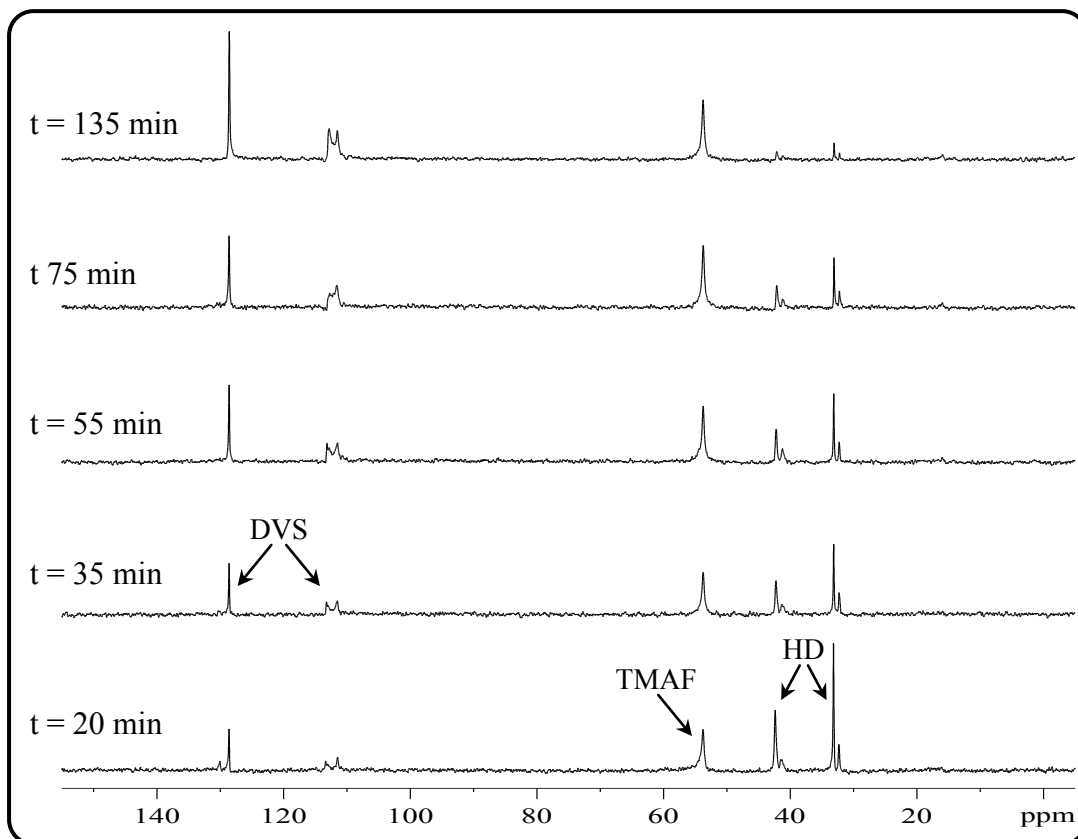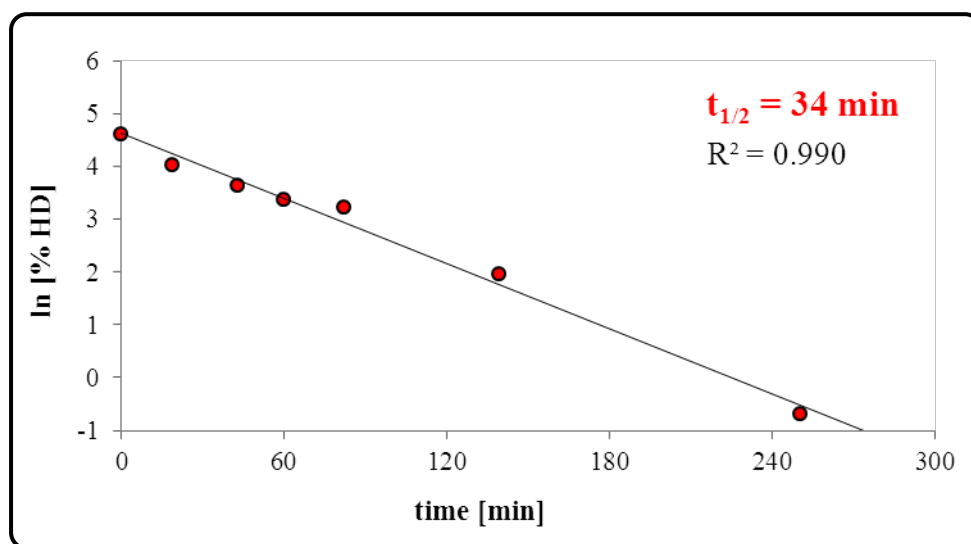

**Fig. S3:** Selected  $^{13}\text{C}$  MAS NMR spectra of adsorbed HD\* (1% wt) on TMAF/ $\text{Al}_2\text{O}_3$  (16, EtOH, 60), containing 1 mmol TMAF, and its degradation profile onto this sorbent.

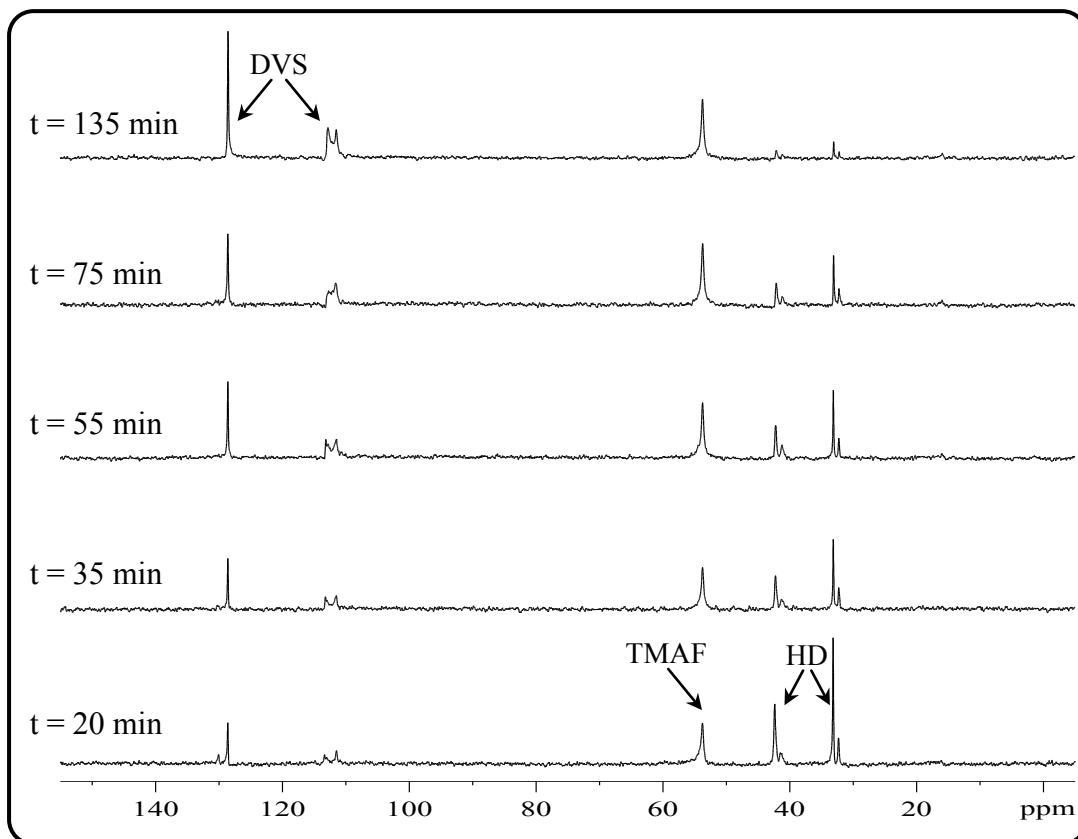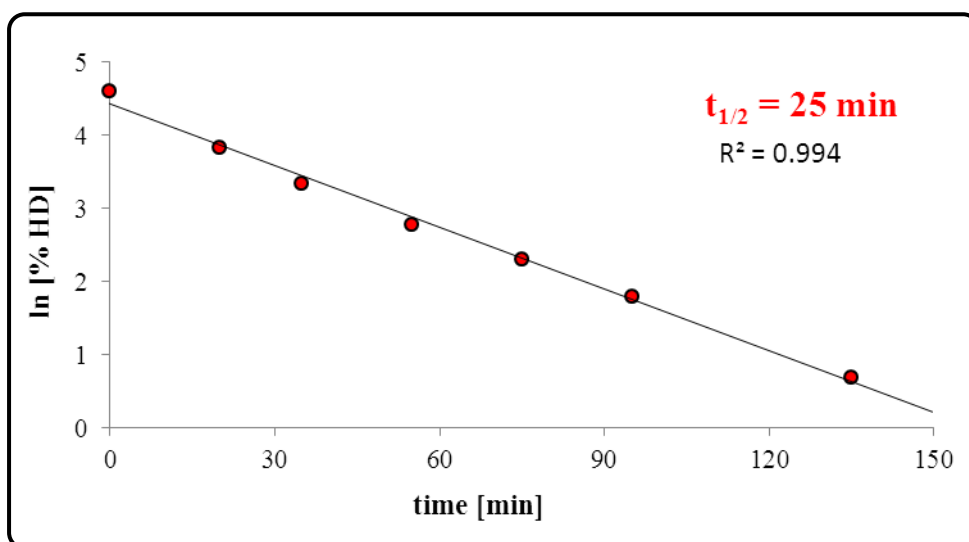

**Fig. S4:** Selected  $^{13}\text{C}$  MAS NMR spectra of adsorbed HD\* (1% wt) on TMAF/ $\text{Al}_2\text{O}_3$  (33, EtOH, 60), containing 2 mmol TMAF, and its degradation profile onto this sorbent.

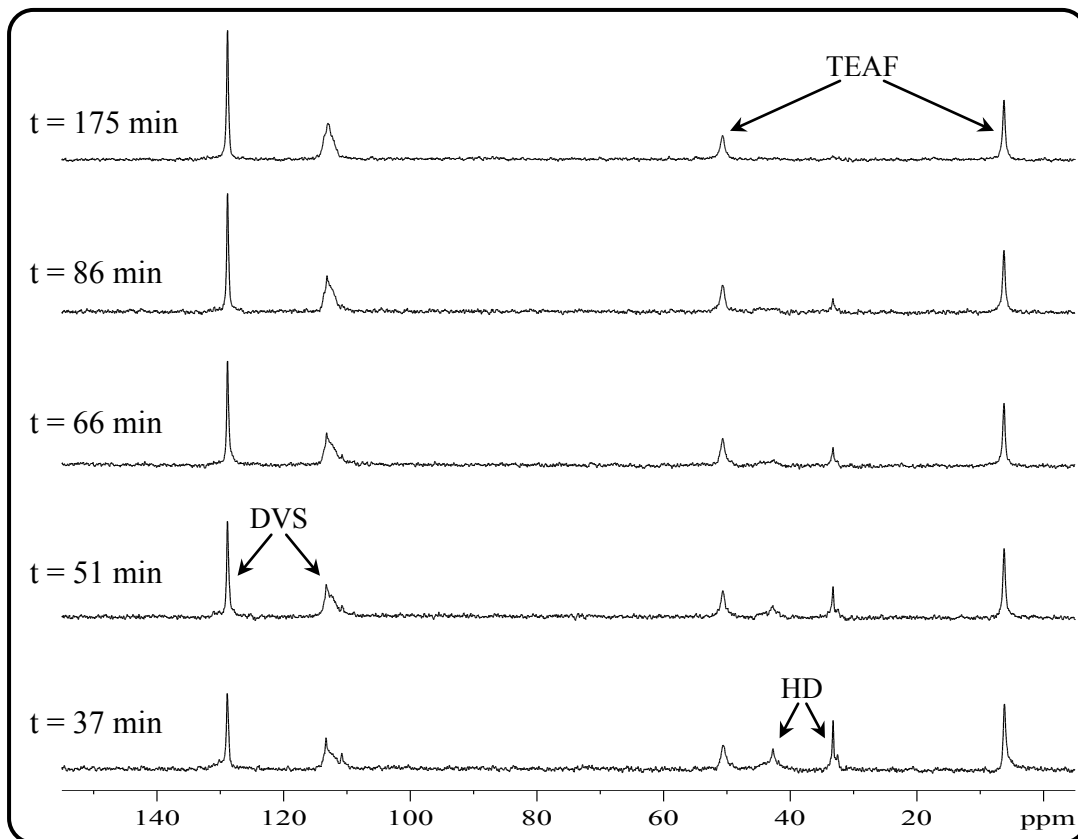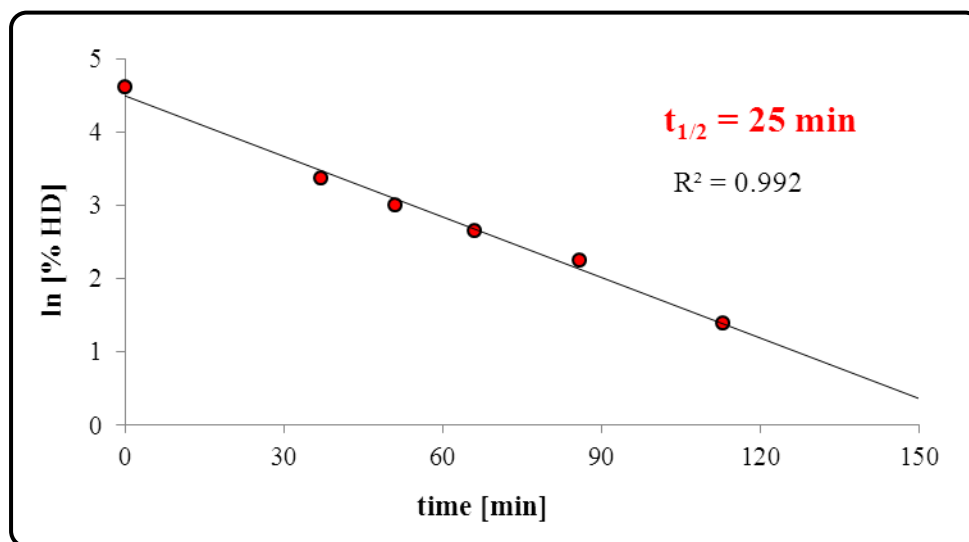

**Fig. S5:** Selected  $^{13}\text{C}$  MAS NMR spectra of adsorbed HD\* (1% wt) on TEAF/ $\text{Al}_2\text{O}_3$  (18, EtOH, 60), containing 1 mmol TEAF, and its degradation profile onto this sorbent.

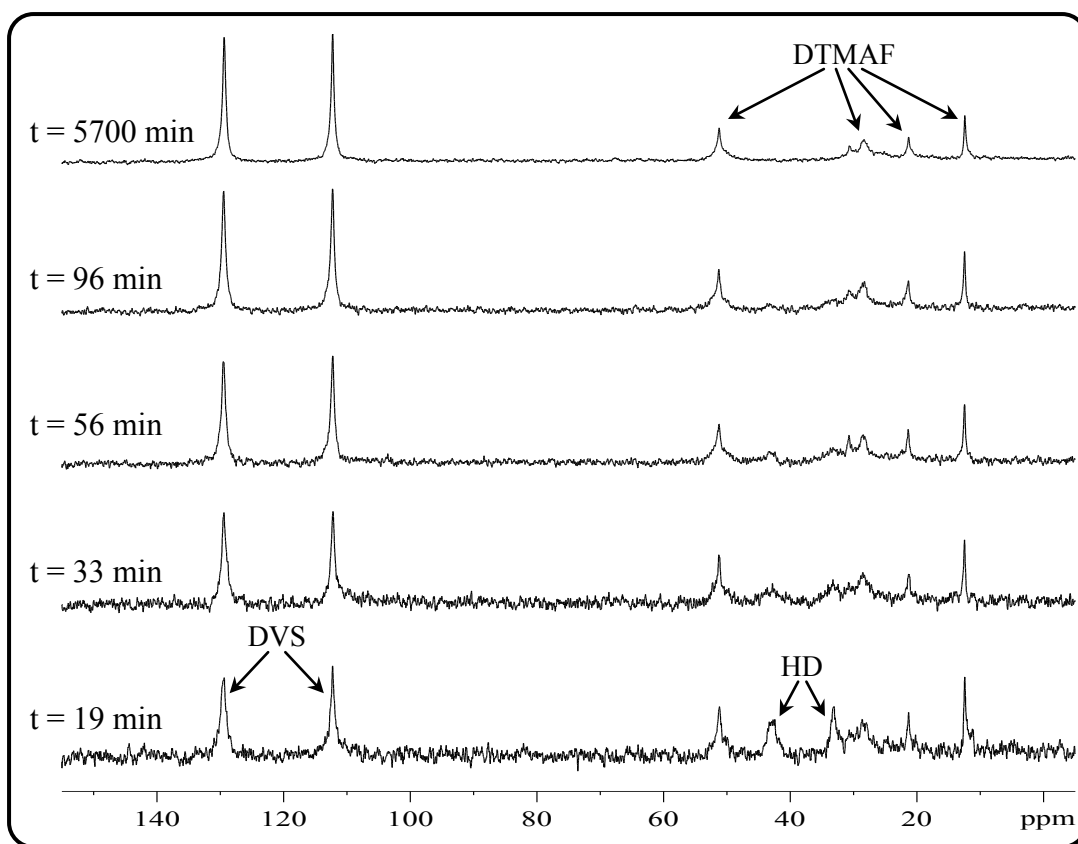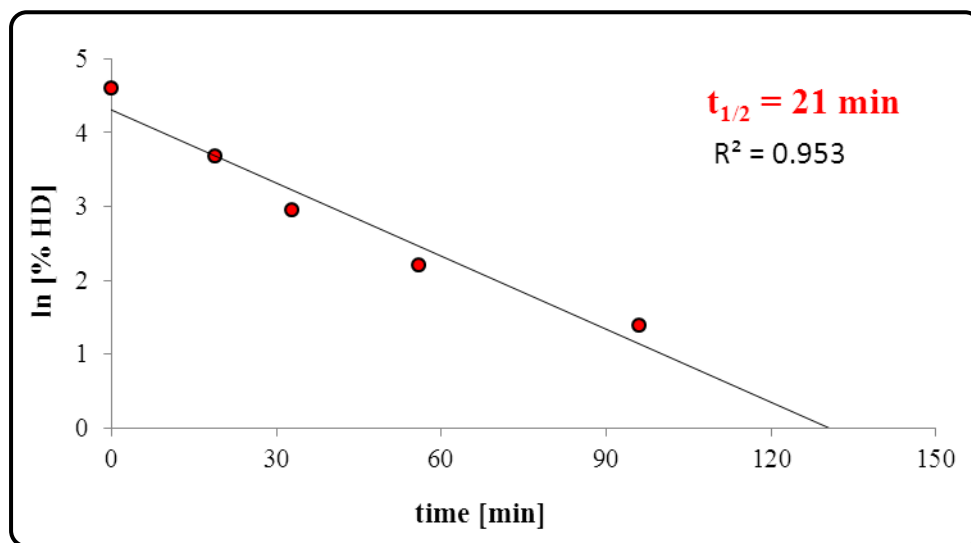

**Fig. S6:** Selected  $^{13}\text{C}$  MAS NMR spectra of adsorbed HD\* (1% wt) on DTMAF/ $\text{Al}_2\text{O}_3$  (27, EtOH, 60), containing 1 mmol DTMAF, and its degradation profile onto this sorbent.

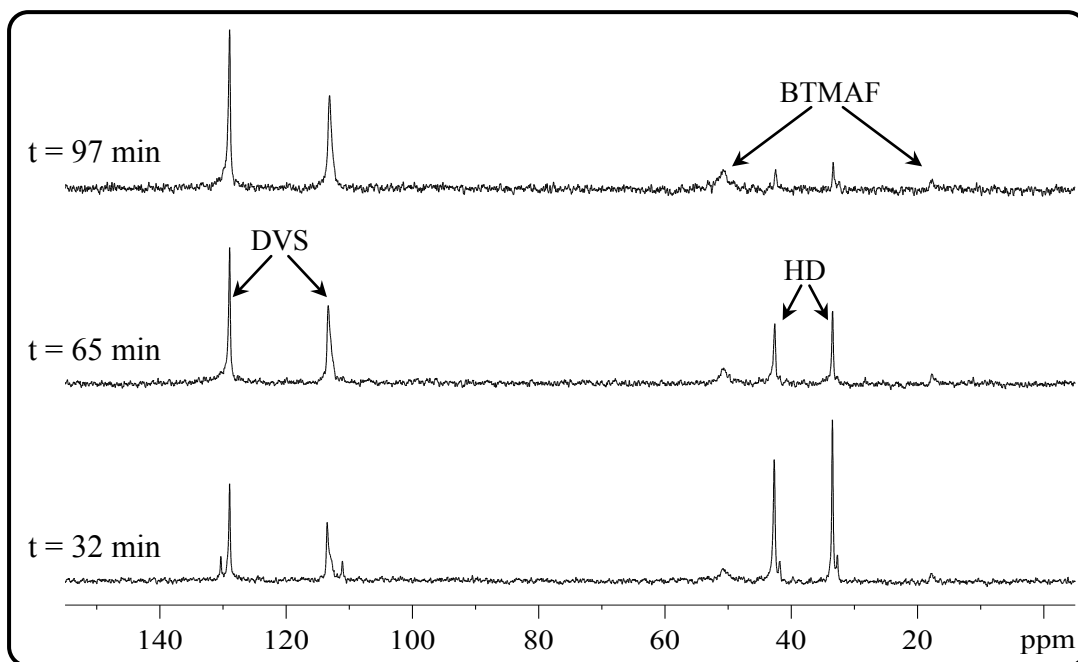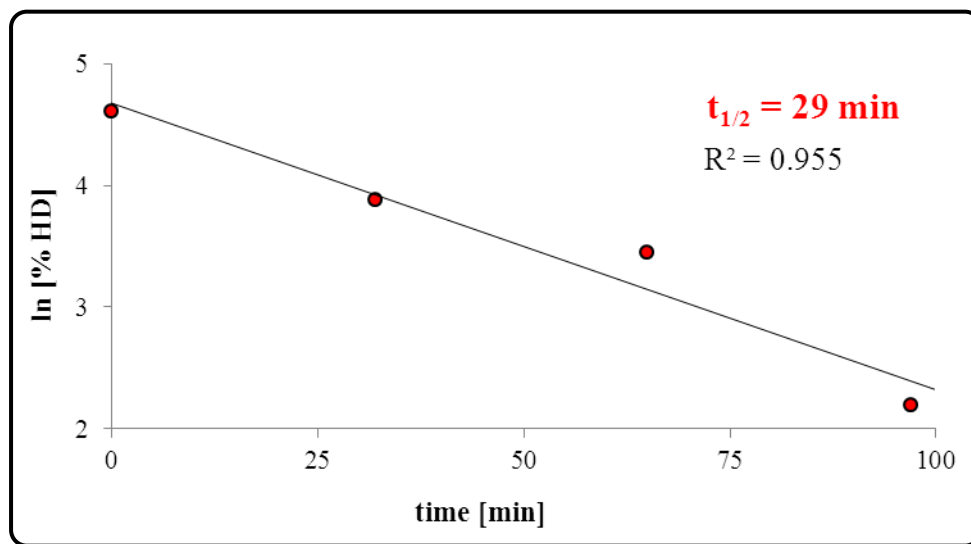

**Fig. S7:**  $^{13}\text{C}$  MAS NMR spectra of adsorbed HD\* (1% wt) on BTMAF/ $\text{Al}_2\text{O}_3$  (20, EtOH, 60), containing 1 mmol TAAF, and its degradation profile onto this sorbent.

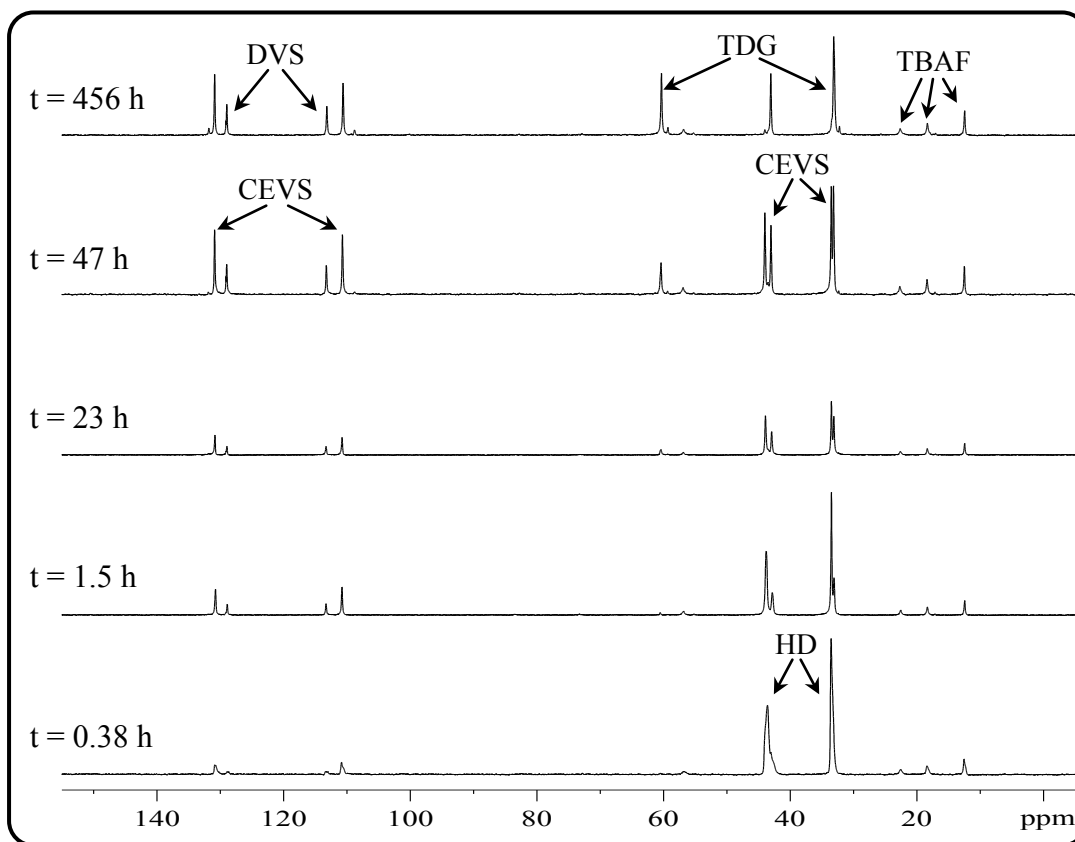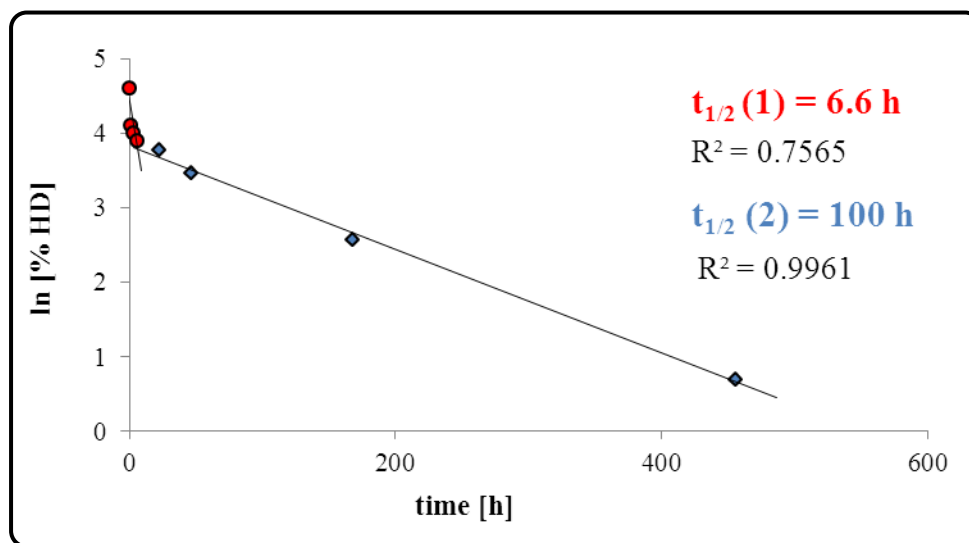

**Fig. S8:** Selected  $^{13}\text{C}$  MAS NMR spectra of adsorbed HD\* (5% wt) on TBAF/ $\text{Al}_2\text{O}_3$  (20, EtOH, 60) and its degradation profile onto this sorbent.



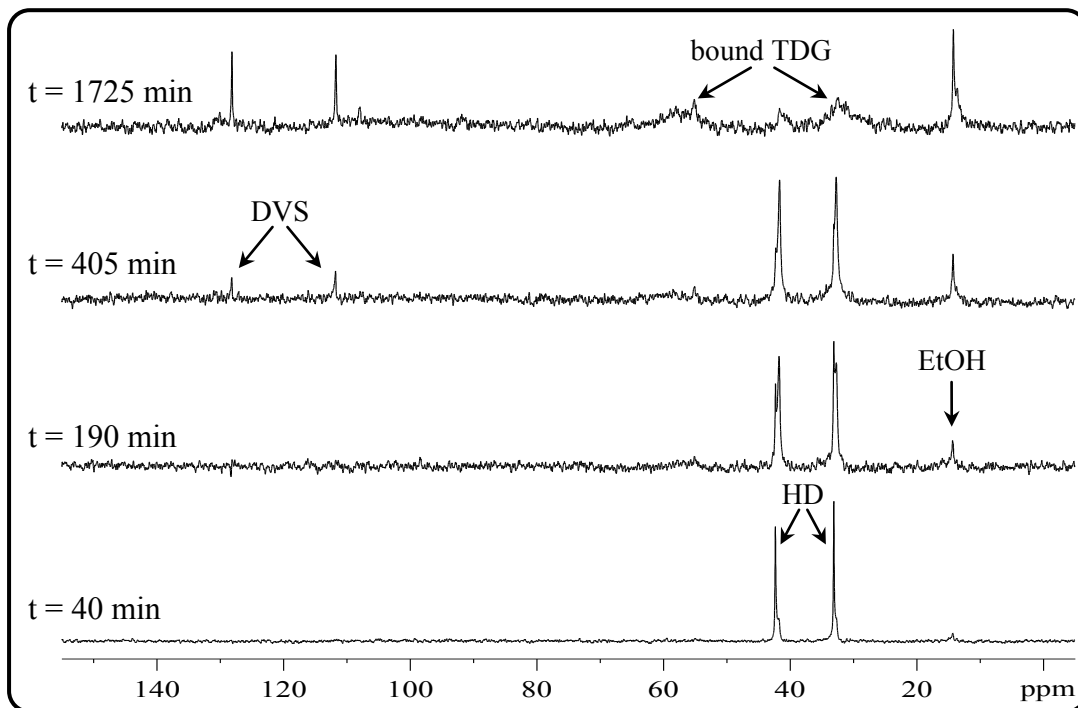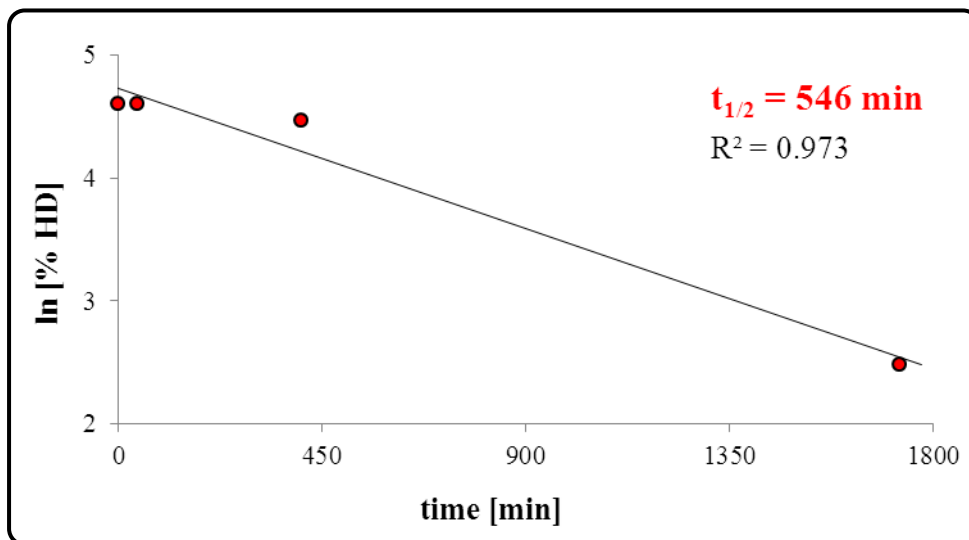

**Fig. S9:**  $^{13}\text{C}$  MAS NMR spectra of adsorbed HD\* (1% wt) on KF/SiO<sub>2</sub> (12, EtOH, 60), containing 2 mmol KF, and its degradation profile onto this sorbent.

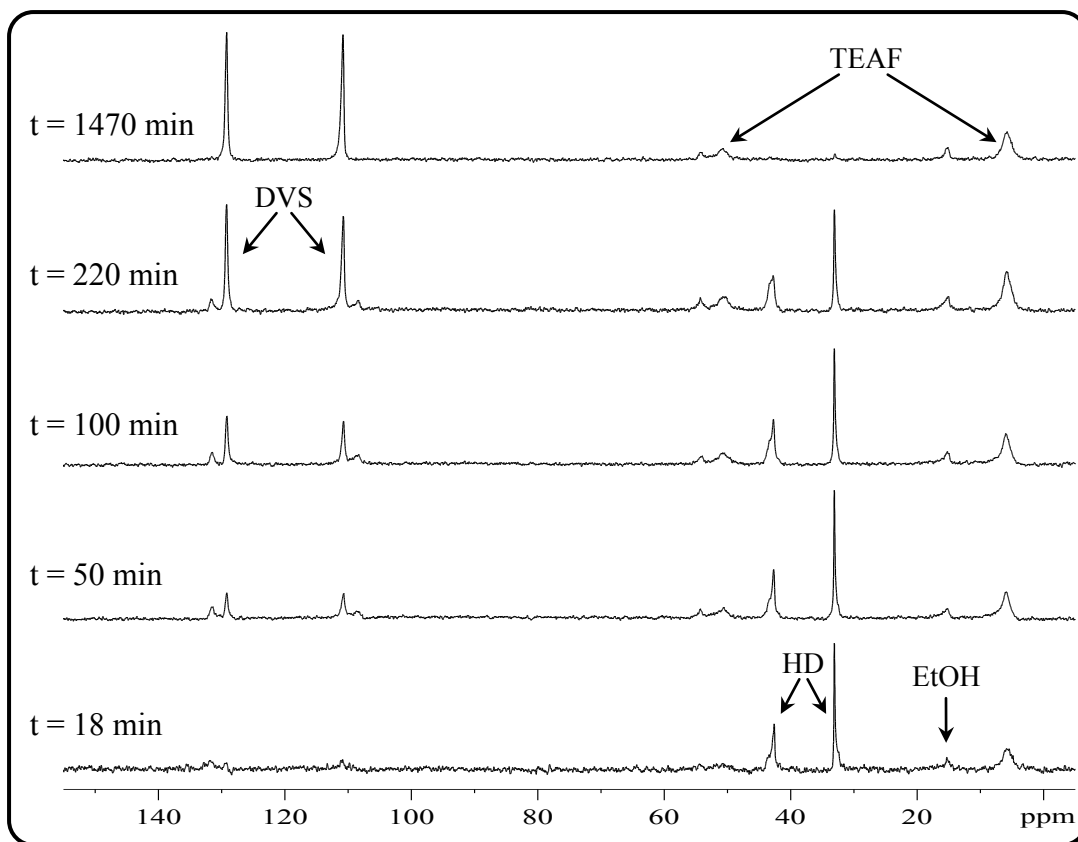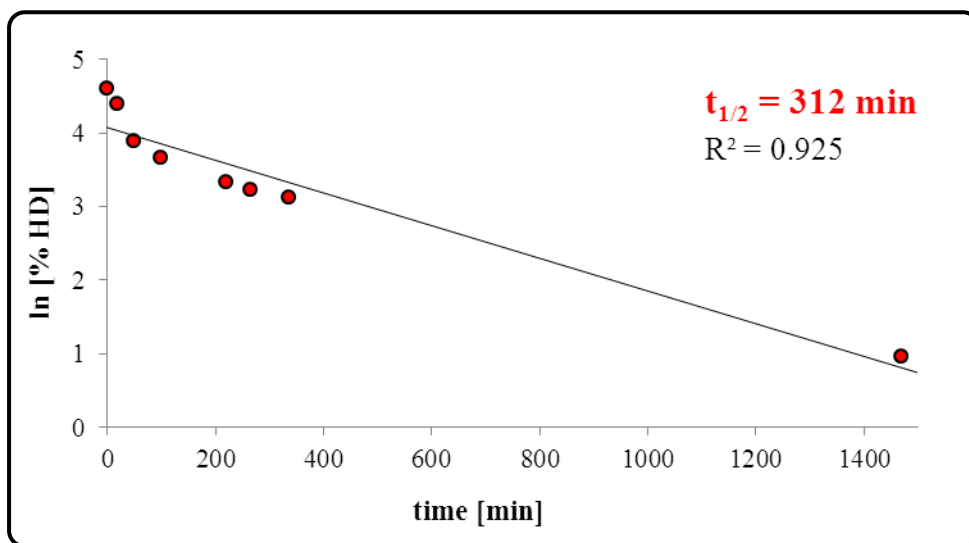

**Fig. S10:** Selected  $^{13}\text{C}$  MAS NMR spectra of adsorbed HD\* (1% wt) on TEAF/SiO<sub>2</sub> (18, EtOH, 60), containing 1 mmol TEAF, and its degradation profile onto this sorbent.

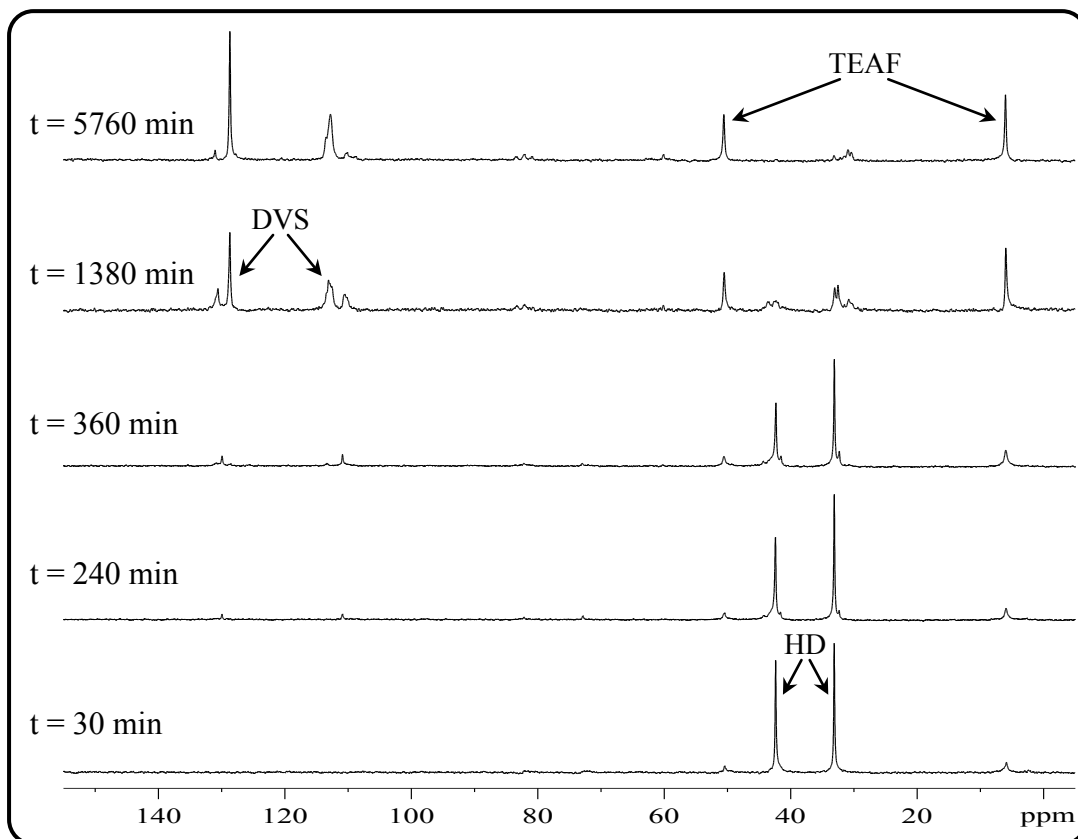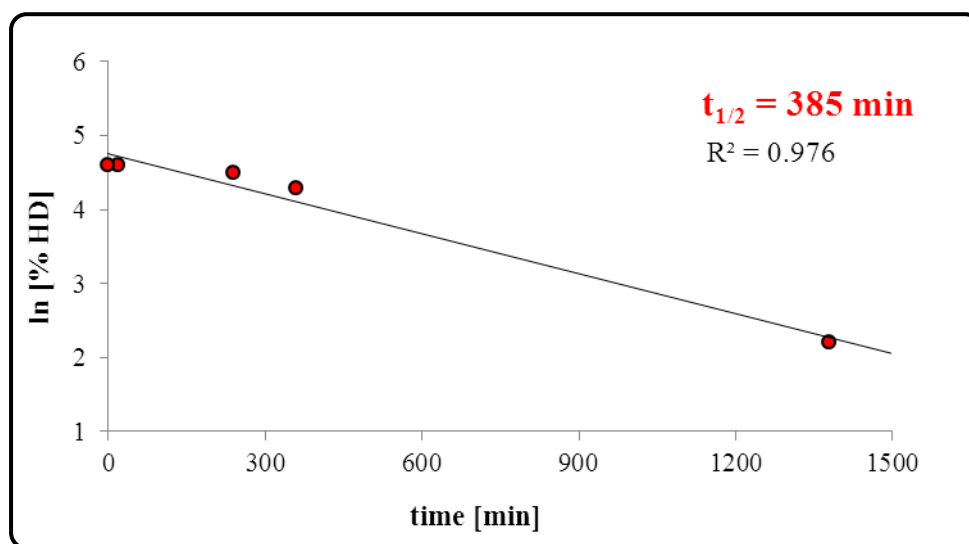

**Fig. S11:** Selected  $^{13}\text{C}$  MAS NMR spectra of adsorbed HD\* (1% wt) on TEAF/TiO<sub>2</sub> (18, EtOH, 60), containing 1 mmol TEAF, and its degradation profile onto this sorbent.

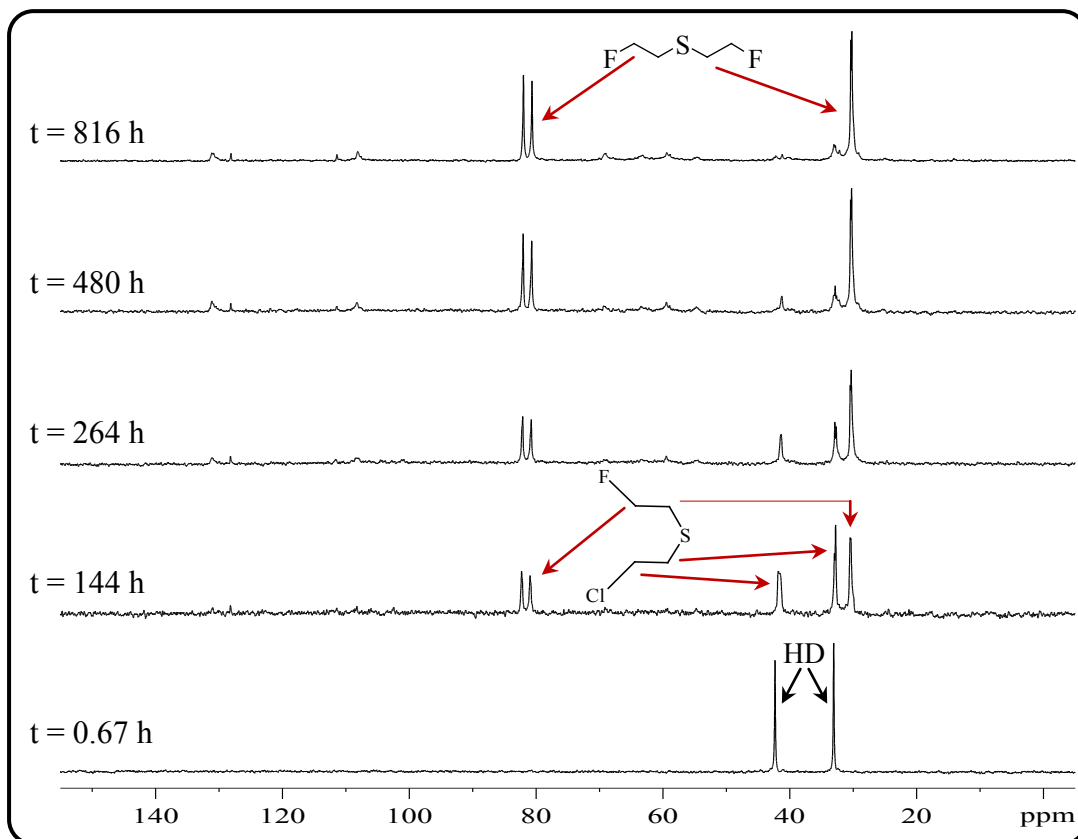

$t_{1/2} > 24$  h

**Fig. S12:** Selected  $^{13}\text{C}$  MAS NMR spectra of adsorbed HD\* (1% wt) on KF/TiO<sub>2</sub> (12, EtOH, 60), containing 2 mmol KF. One of the degradation products on this sorbent is (2-chloroethyl)(2-fluoroethyl) sulfide. The NMR chemical shifts of this product are overlapping with HD\* and bis(2-fluoroethyl)sulfide.

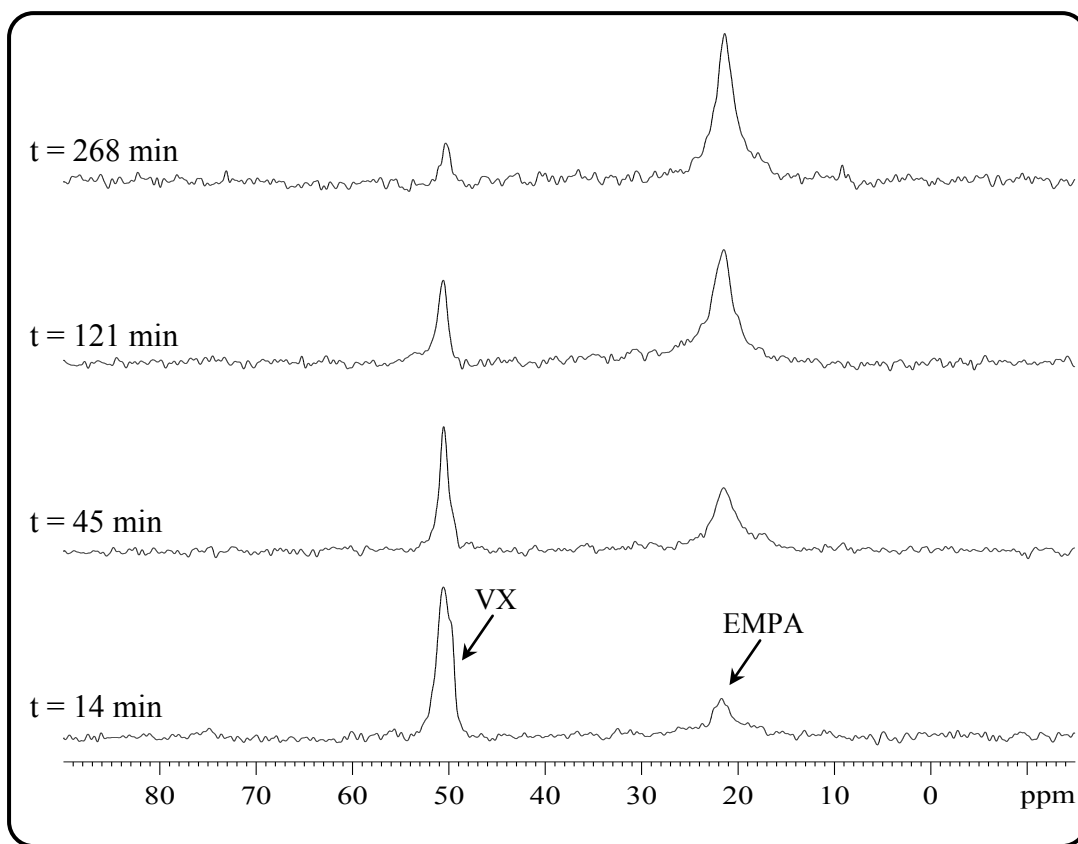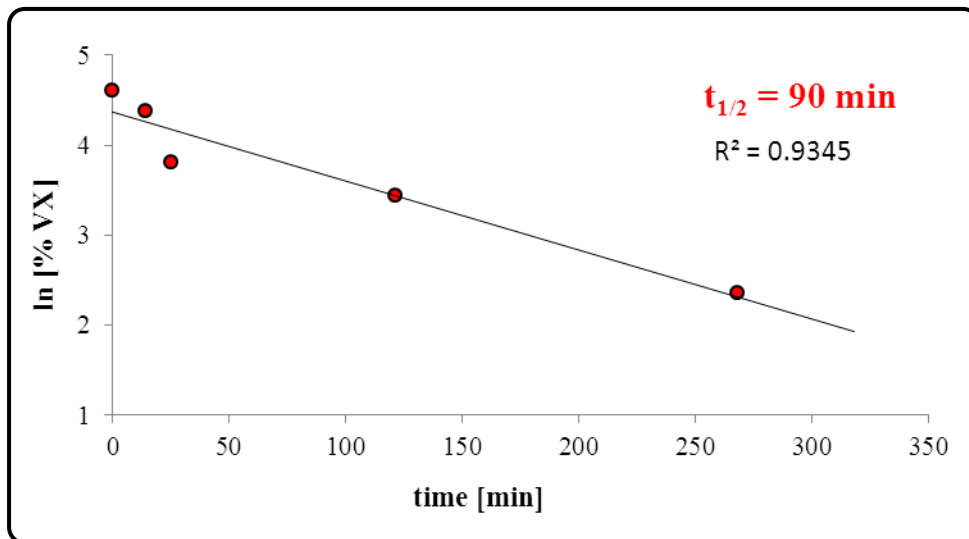

**Fig. S13:** Selected  $^{31}\text{P}$  MAS NMR spectra of adsorbed VX (1% wt) on  $\text{KF}/\text{Al}_2\text{O}_3$  (25, EtOH, 60) and its degradation profile onto this sorbent.

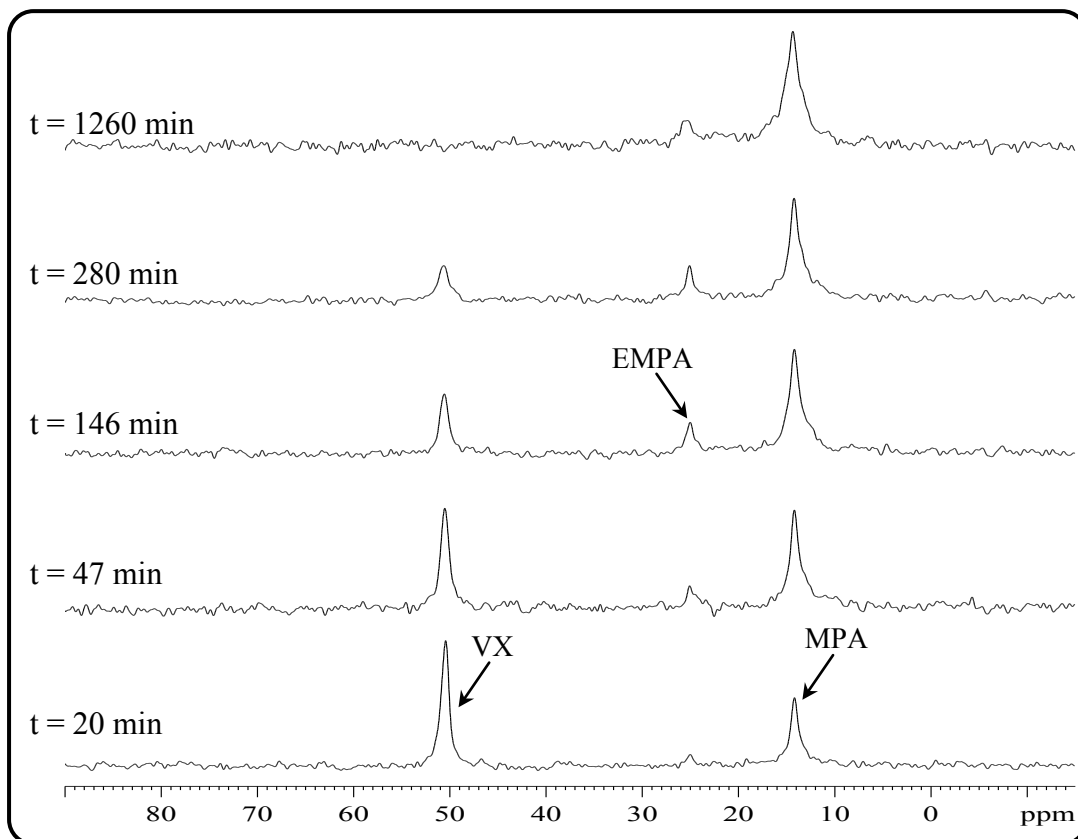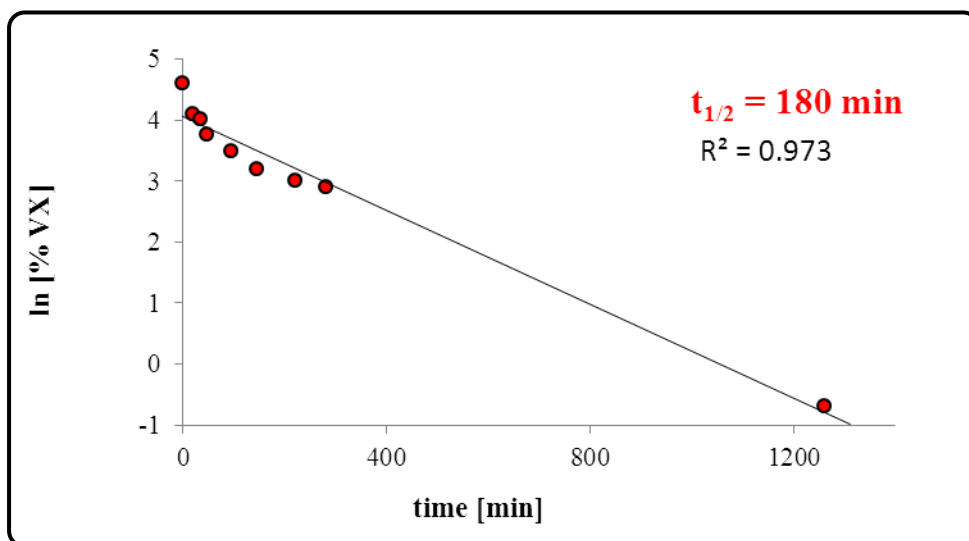

**Fig. S14:** Selected  $^{31}\text{P}$  MAS NMR spectra of adsorbed VX (1% wt) on TBAF/ $\text{Al}_2\text{O}_3$  (20, EtOH, 60) and its degradation profile onto this sorbent.

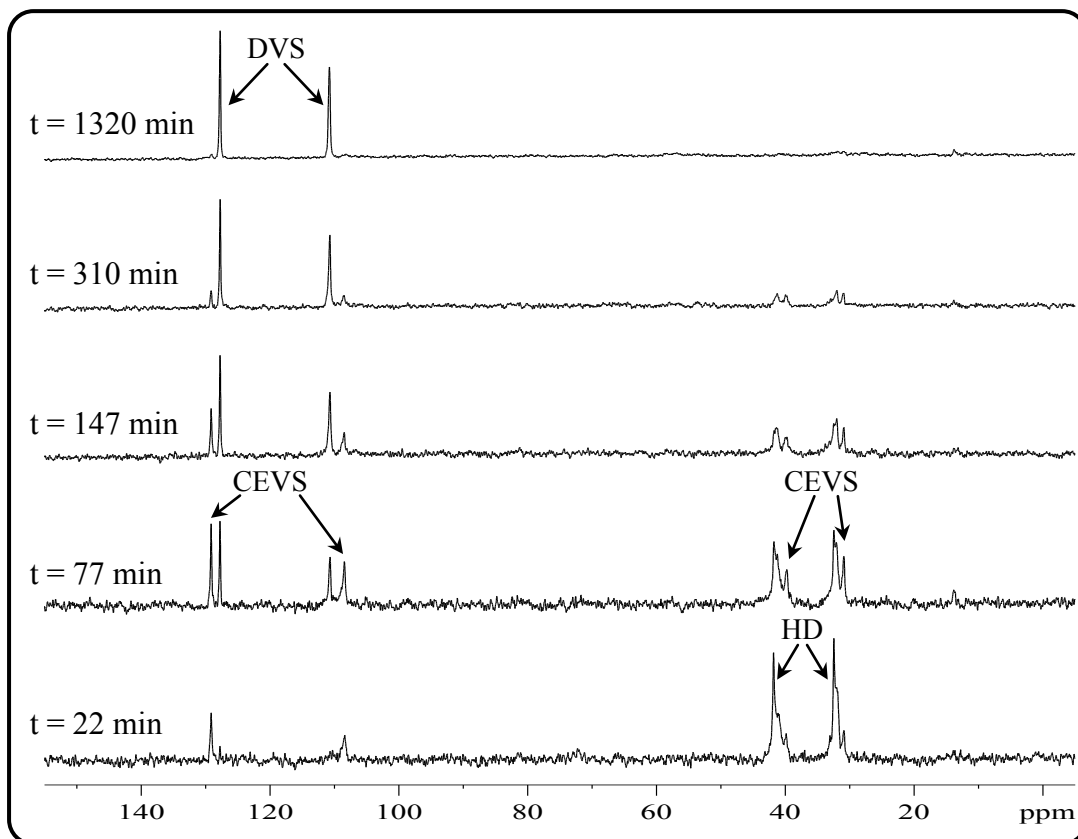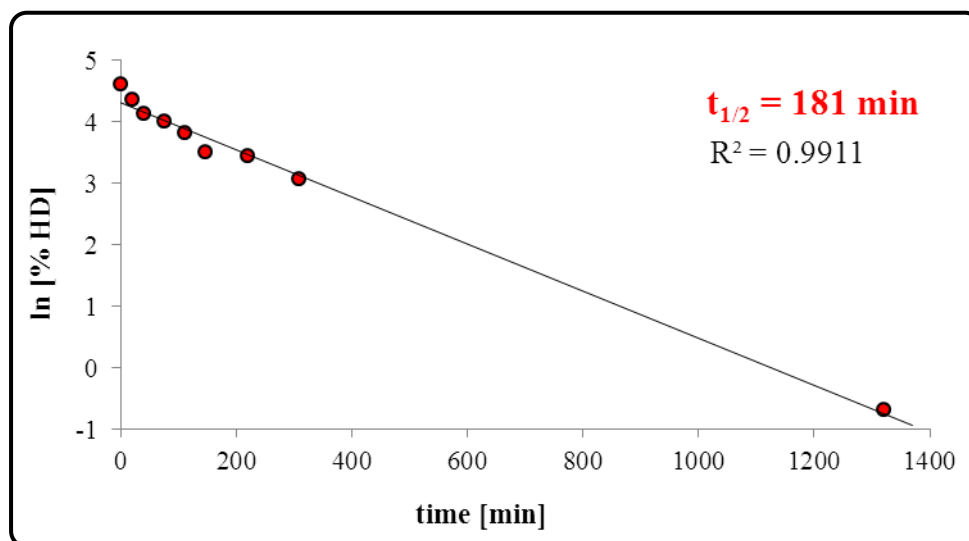

**Fig S15:** Selected  $^{13}\text{C}$  MAS NMR spectra of adsorbed HD\* (1% wt) on  $\text{KF}/\text{Al}_2\text{O}_3$  (25, EtOH, 60) and its degradation profile onto this sorbent.

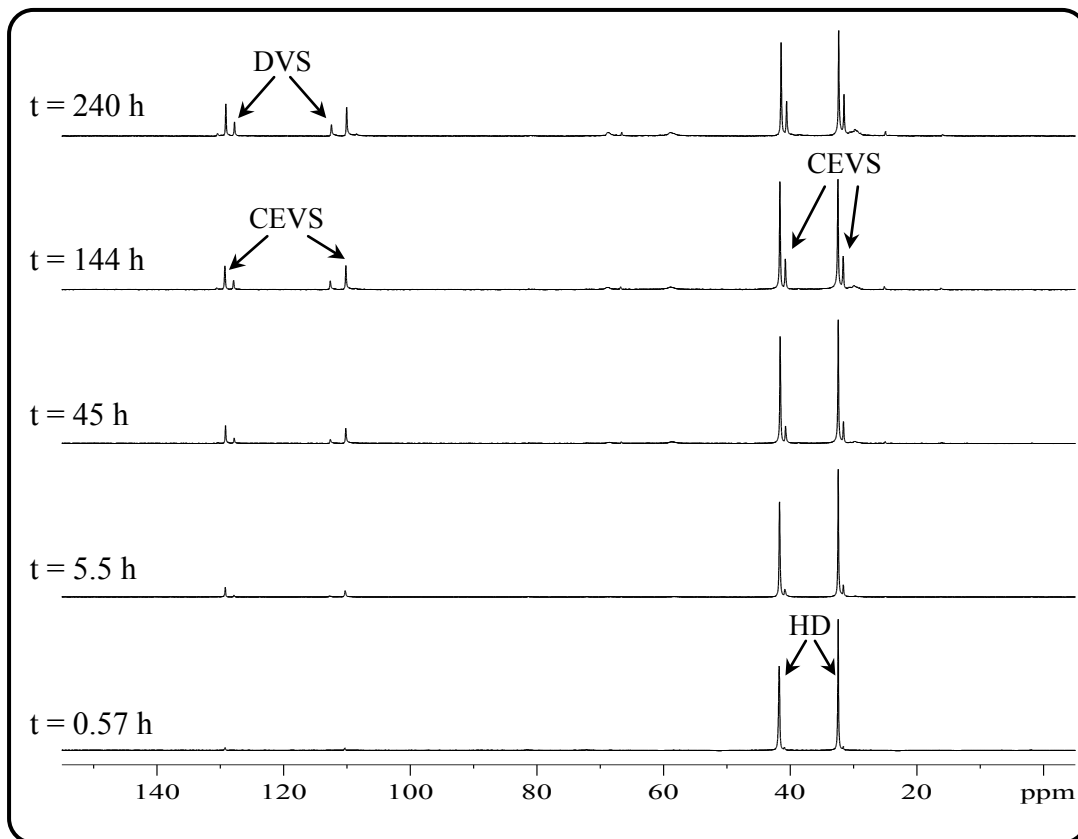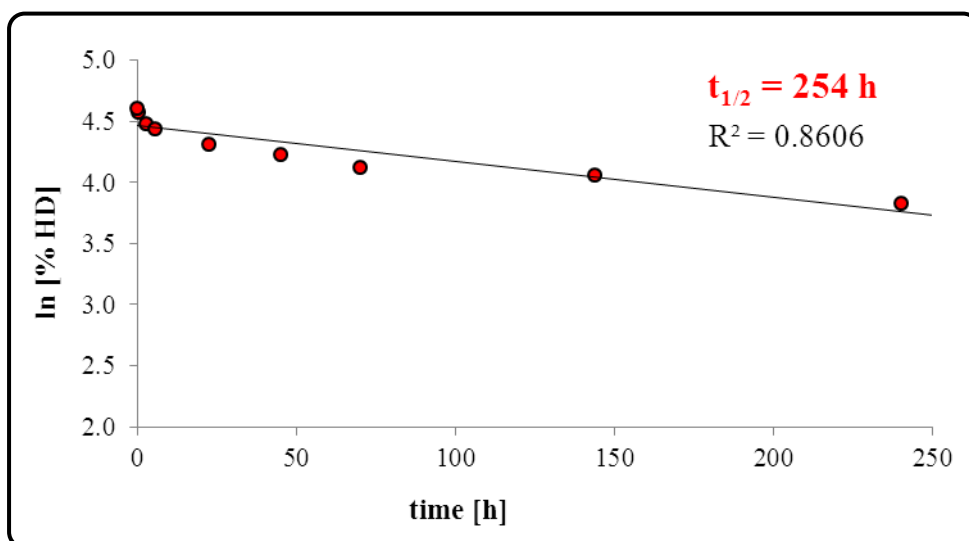

**Fig. S16:** Selected <sup>13</sup>C MAS NMR spectra of adsorbed HD\* (10% wt) on KF/Al<sub>2</sub>O<sub>3</sub> (25, EtOH, 60) and its degradation profile onto this sorbent.



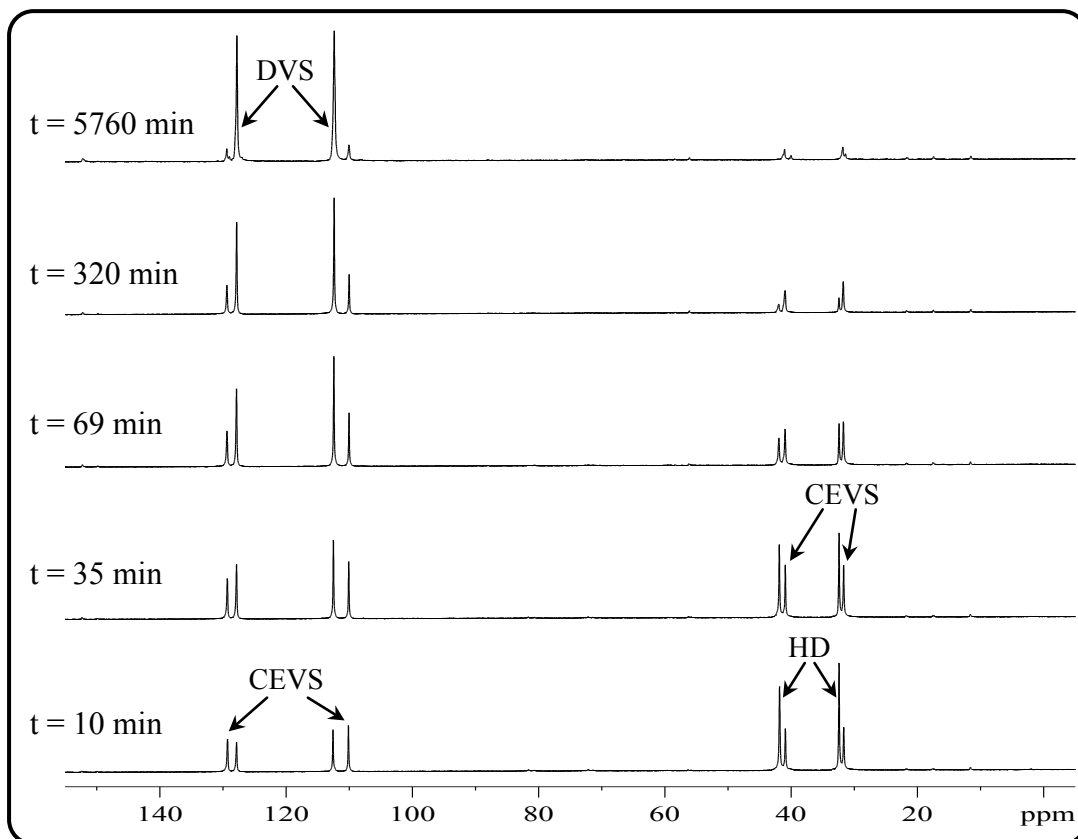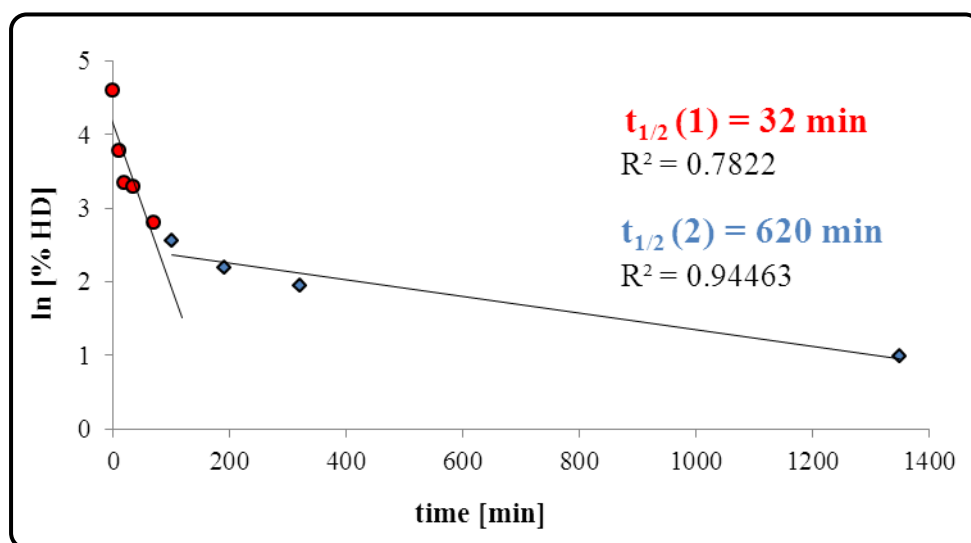

**Fig. S17:** Selected  $^{13}\text{C}$  MAS NMR spectra of adsorbed HD\* (10% wt) on TBAF/KF/Al<sub>2</sub>O<sub>3</sub> (20, 20, EtOH, 60) and its degradation profile onto this sorbent.

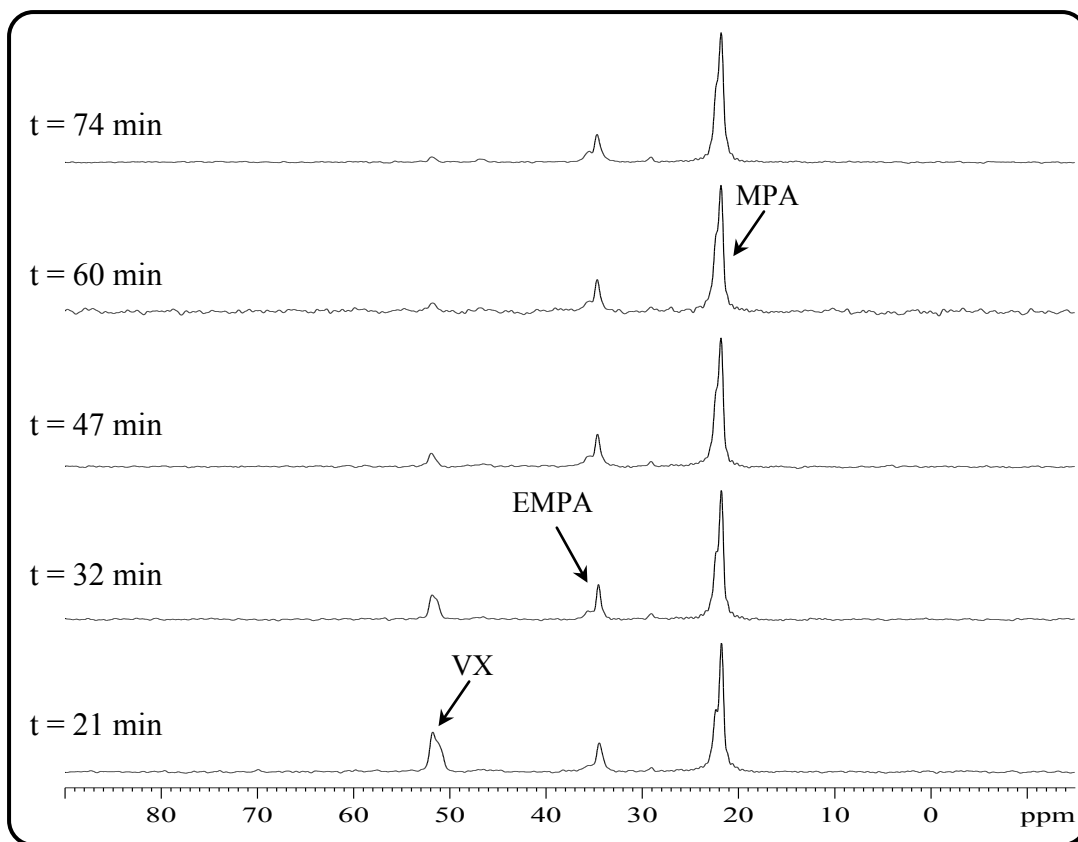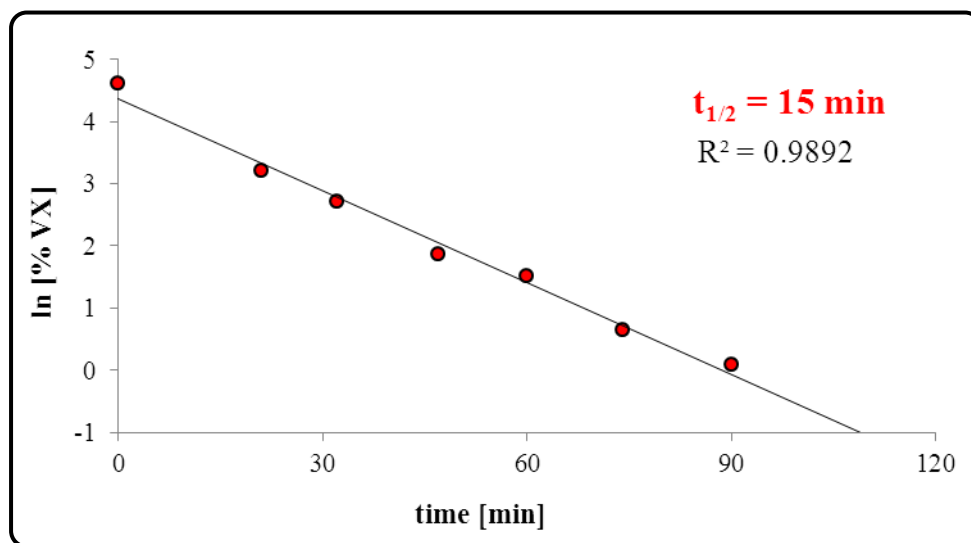

**Fig S18:** Selected  $^{31}\text{P}$  MAS NMR spectra of adsorbed VX (10% wt) on TBAF/KF/ $\text{Al}_2\text{O}_3$  (20, 20, EtOH, 60) and its degradation profile onto this sorbent.

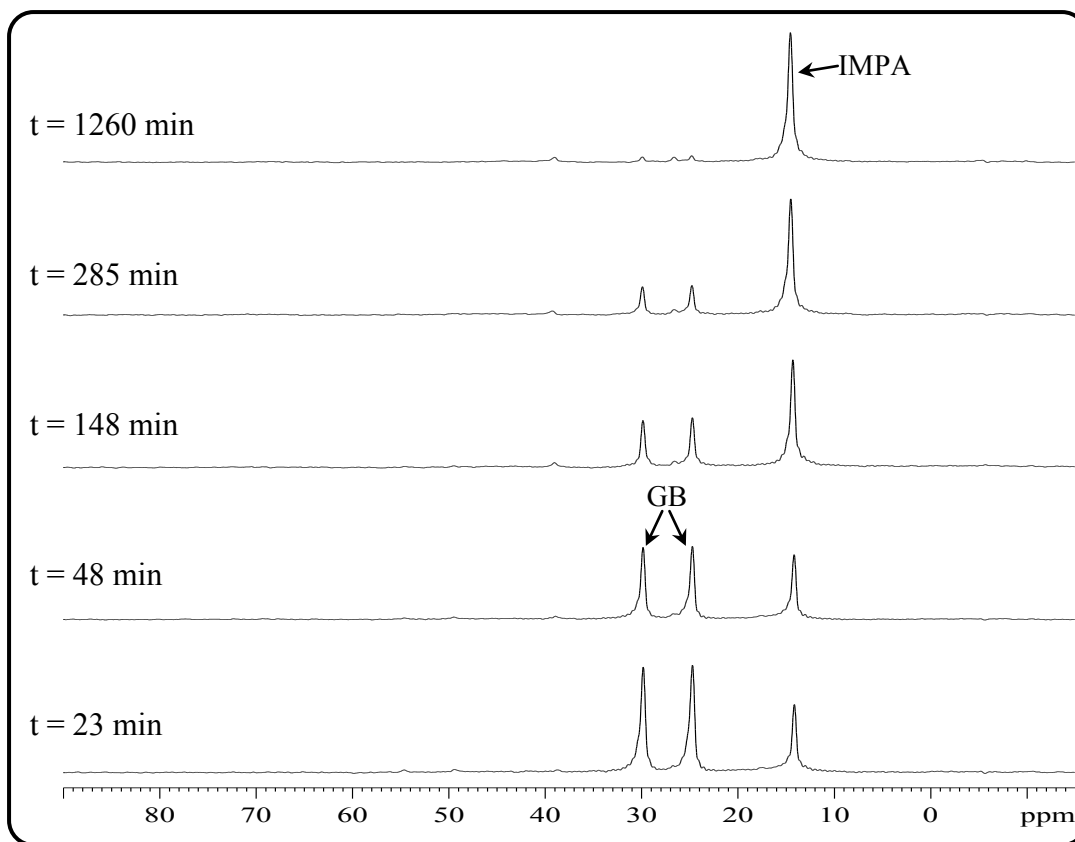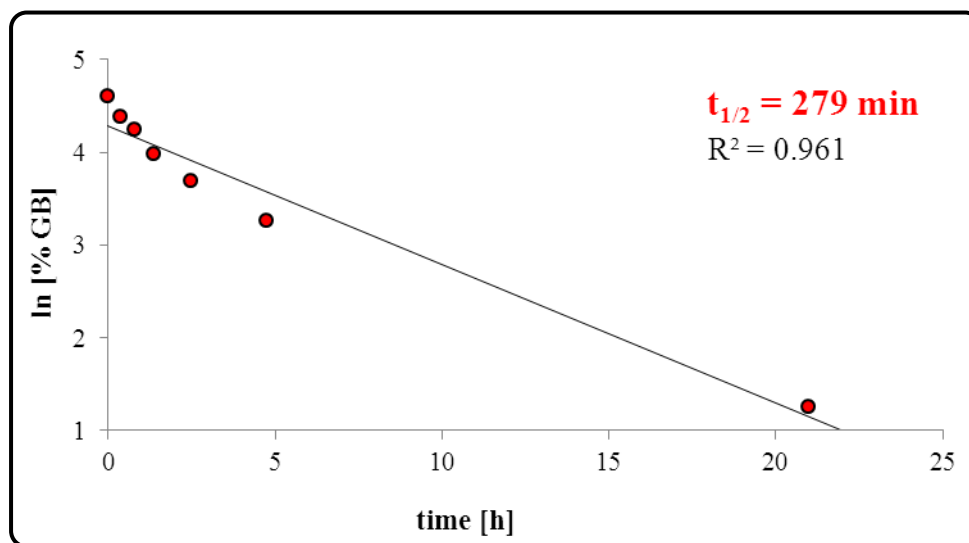

**Fig S19:**  $^{31}\text{P}$  MAS NMR spectra of adsorbed GB (10% wt) on TBAF/KF/ $\text{Al}_2\text{O}_3$  (20, 20, EtOH, 60) and its degradation profile onto this sorbent.

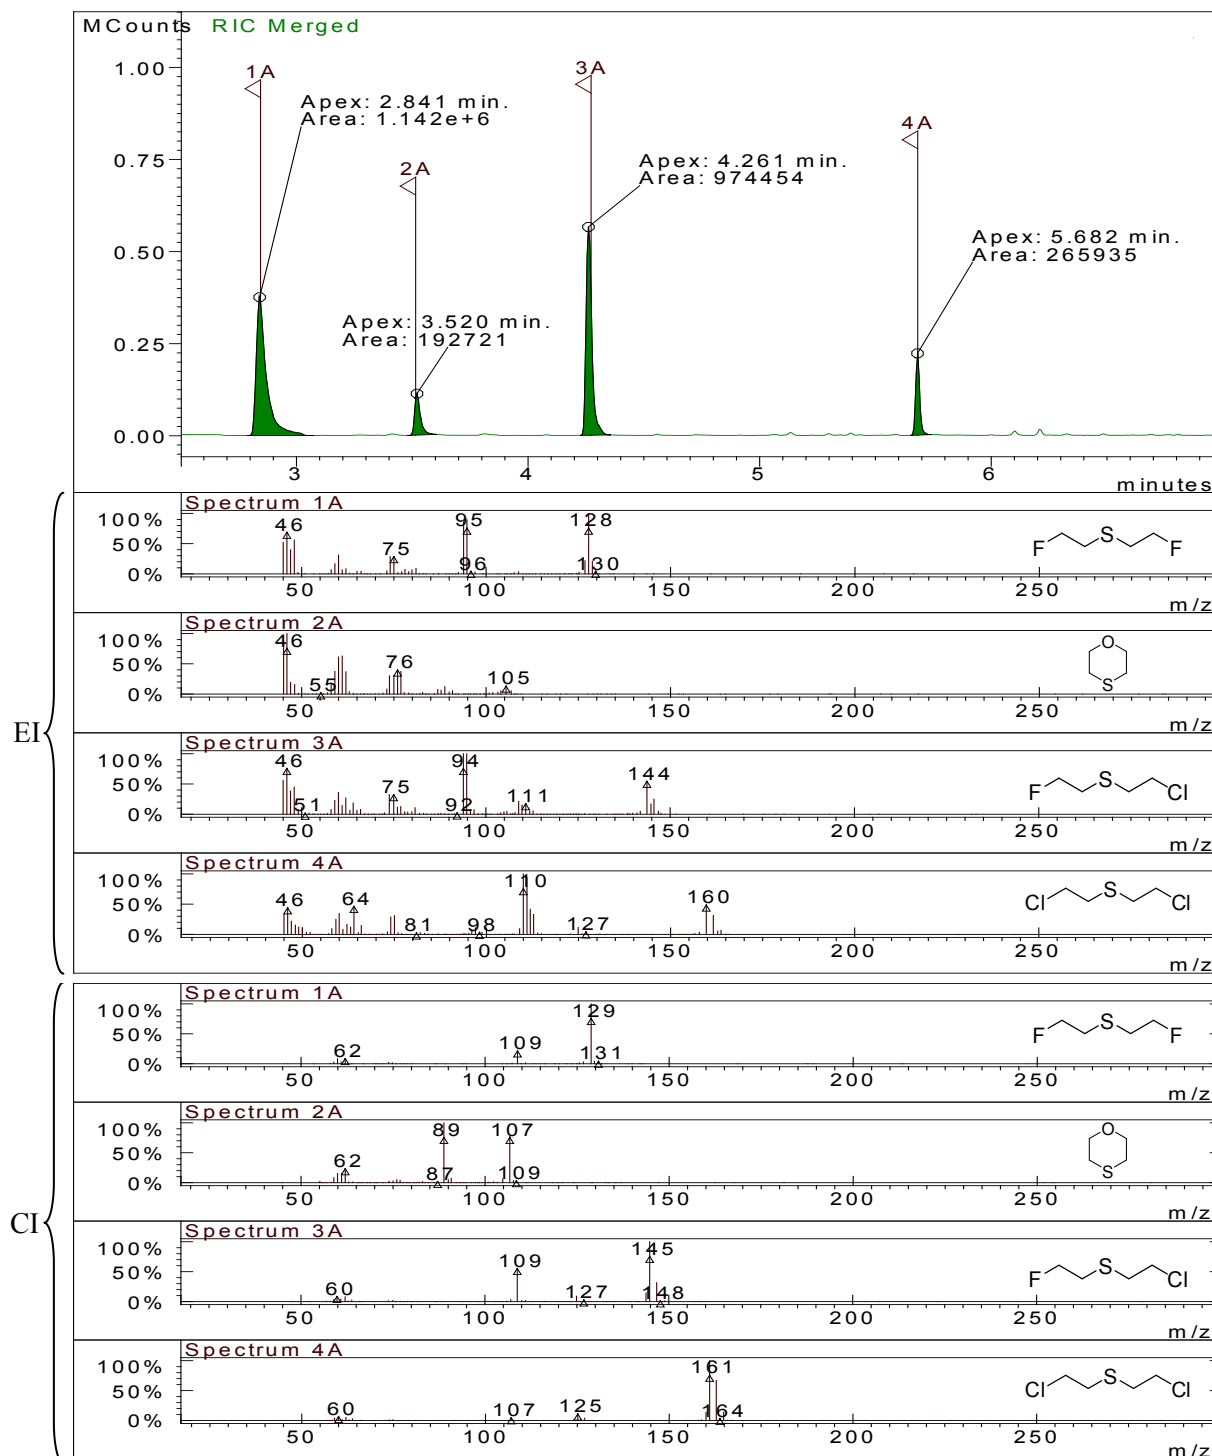

**Fig. S20:** The GC-MS-EI chromatogram and the EI and CI mass spectra of the degradation products from the extraction mixture of HD\* on KF/TiO<sub>2</sub> (12, EtOH, 60).
